# Supplementary material for: Inferring transcription factor collaborations in gene regulatory networks
Source: PubMed Central journal article supplement (PMC4080427; doi:10.1186/1752-0509-8-s1-s1), 2014-01-24
Supplement: 1752-0509-8-S1-S1-S1.pdf [file 1752-0509-8-S1-S1-S1.pdf]

**Additional file 1: Supplementary Materials for Awad et al. Figures S1, S2, Table S1, and S2.**

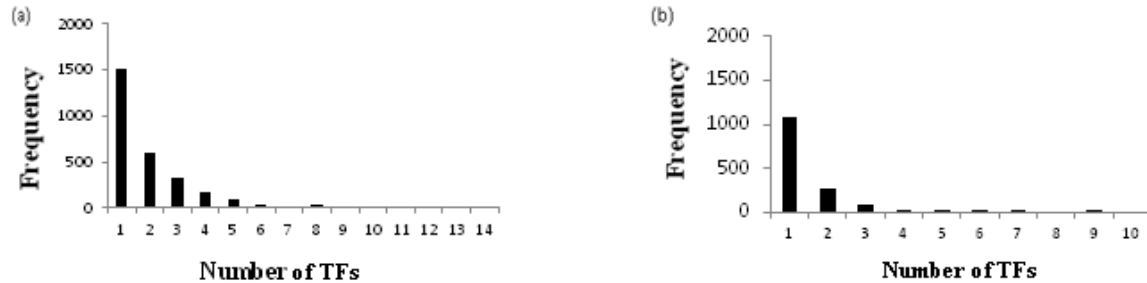

Figure S1: Distribution of the genes bound by the same TFs for the Harbison (a) and the Reimand (b) datasets.

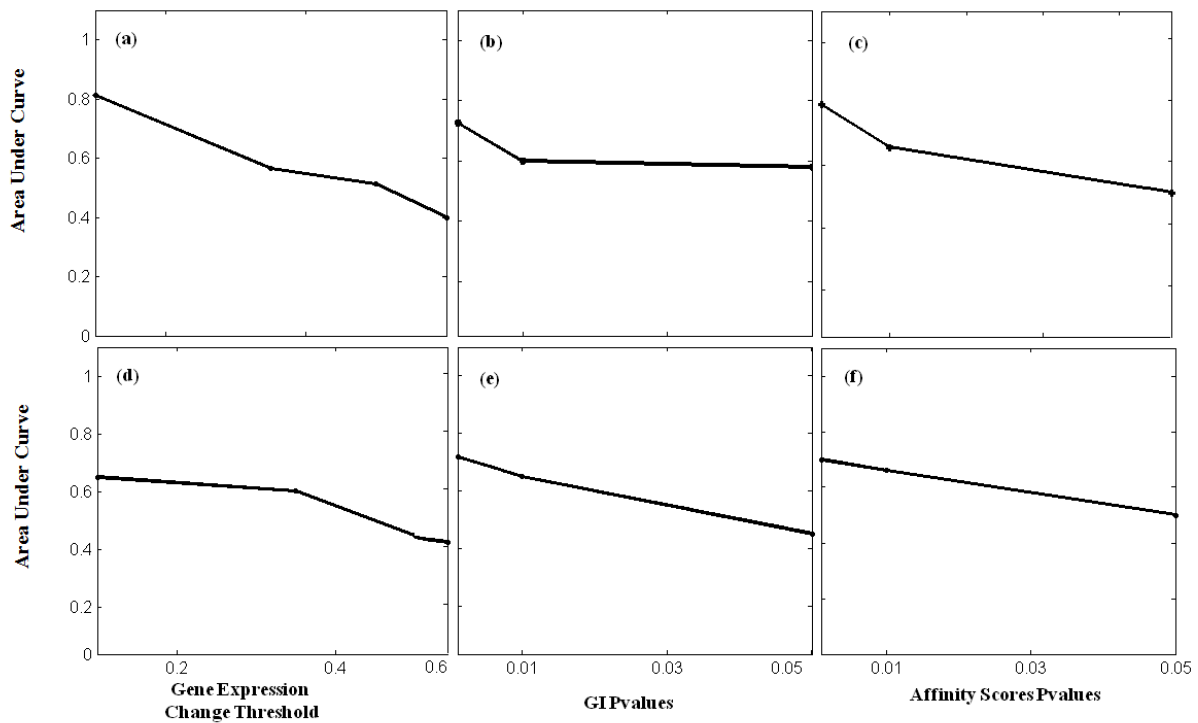

Figure S2: Performance of mTRIM on the Harbison dataset using (a) different gene expression cutoffs, (b) different GI cutoffs, (c) different Afnscore cutoffs; and performance of mTRIM on the Reimand dataset using (d) different gene expression cutoffs, (e) different GI cutoffs, (f) different Afnscore cutoff.

Table S1: Yeast cell cycle time series data. Three time-series microarray datasets commonly used for yeast cell cycle studies were collected (Spellman 1998). It has in total 49 time-points. In these studies, yeast cells were synchronized to the same cell cycle stage, released from synchronization, and then total RNA samples were taken at even intervals for a period of time.

| Data type                          | Time-points                      |
|------------------------------------|----------------------------------|
| A-factor synchronization           | Every 7 minutes for 2 hours      |
| CDC-28 heat-based synchronization. | Every 10 minutes for 2.67 hours. |
| Elutriation synchronization.       | Every 30 minutes for 6.5 hours.  |

Table S2: Number of the regulatory modules on both Harbison and Reimand datasets. Clearly, in the majority of the regulatory modules, target genes are regulated by multiple TFs.

| Number of TFs in a regulatory module | Number of regulatory modules on the Harbison Dataset | Number of regulatory modules on Reimand Dataset |
|--------------------------------------|------------------------------------------------------|-------------------------------------------------|
| 1                                    | 988                                                  | 630                                             |
| 2                                    | 504                                                  | 253                                             |
| 3                                    | 296                                                  | 82                                              |
| 4                                    | 153                                                  | 36                                              |
| 5                                    | 94                                                   | 16                                              |
| 6                                    | 34                                                   | 6                                               |
| 7                                    | 23                                                   | 6                                               |
| 8                                    | 29                                                   | 1                                               |
| 9                                    | 8                                                    | 0                                               |
| 10                                   | 15                                                   | 1                                               |
| 11                                   | 8                                                    | 0                                               |
| 12                                   | 8                                                    | 0                                               |
| 13                                   | 3                                                    | 0                                               |
| 14                                   | 3                                                    | 0                                               |
| 15                                   | 0                                                    | 0                                               |
| 16                                   | 2                                                    | 0                                               |
| 17                                   | 1                                                    | 0                                               |
| 18                                   | 1                                                    | 0                                               |
| 19                                   | 2                                                    | 0                                               |

## References

Spellman, P. et al. (1998). Comprehensive Identification of Cell Cycle-regulated Genes of the Yeast *Saccharomyces cerevisiae* by Microarray Hybridization. *Molecular Biology of the Cell*, 9, 3273-3297.
